# Supplementary material
Source: HighWire-hosted journal article supplement (https://www.canjsurg.ca/highwire/filestream/96703/field_highwire_adjunct_files/0/cjs-011219-1-at.pdf)
Supplement: cjs-011219-1-at.pdf [file cjs-011219-1-at.pdf]

Copyright © 2020 The Author(s) or their employer(s).  
To receive this resource in an accessible format, please contact us at [cmajgroup@cmaj.ca](mailto:cmajgroup@cmaj.ca).

*Online appendices are unedited and posted as supplied by the authors.*

**Supplementary Table S1:** Characteristics of the ACS models of included sites

| Site                          | Staff model on ACS                                                                                                                                                                             | Members of ACS team (in addition to surgeon)                                                  | Dedicated ACS OR                                                                                                | Dedicated ACS beds |
|-------------------------------|------------------------------------------------------------------------------------------------------------------------------------------------------------------------------------------------|-----------------------------------------------------------------------------------------------|-----------------------------------------------------------------------------------------------------------------|--------------------|
| London Health Sciences Centre | Single surgeon x 7 days<br>Elective practice suspended                                                                                                                                         | Nurse Practitioner<br>1-2 Senior Residents<br>1 Intermediate resident<br>1-2 junior residents | 7 hours/day<br>Monday - Friday                                                                                  | No                 |
| University of Alberta         | Single surgeon x 7 days<br>Elective practice suspended                                                                                                                                         | Hospitalist<br>1-Fellow<br>1-Senior Resident<br>1 – 2 junior residents                        | 8 hours/day<br>Monday - Friday                                                                                  | Yes                |
| QE II Health Sciences Centre  | Single surgeon Mon-Friday during daytime<br>Rotating night time coverage<br>Single surgeon Saturday-Sunday                                                                                     | 2-3 senior residents (R3-R4)<br>2 junior residents<br>1-2 clerks<br>No nurse practitioner     | 12hrs 5d/week<br>shared resource on evenings and weekends                                                       | Yes                |
| Hamilton Health Sciences      | Single surgeon x 7 days<br>Elective practice suspended                                                                                                                                         | 1-2 junior residents<br>1 senior resident                                                     | No dedicated ACS OR; access to daytime Emerg OR shared by all surgical services starting at noon                | No                 |
| St. Joseph's Health Care      | Single surgeon x 7 days/nights<br>Elective practice suspended                                                                                                                                  | 1-2 junior residents<br>1 senior resident                                                     | No dedicated ACS OR; access to daytime Emerg OR shared by all surgical services starting at 11:00               | No                 |
| Vancouver General Hospital    | 3 teams (ACS 1, 2, 3) with rotating 24 hr call<br>Surgeons take 24 hr calls with their teams<br>Surgeons block most activities on their ACS weeks, and all activities on their 2-3 intake days | Each team has:<br>1 Fellow or Senior Resident<br>1-2 Junior residents                         | Full days (9 hours) Monday to Friday<br>Half days (3 hours) Saturday and Sunday<br>Plus emergency time at night | No                 |

*Online appendices are unedited and posted as supplied by the authors.*

|                             |                                                                                                                                        |                     |                                                                             |    |
|-----------------------------|----------------------------------------------------------------------------------------------------------------------------------------|---------------------|-----------------------------------------------------------------------------|----|
| William Osler Health System | EGH: 1 ACS surgeon running service 5 days a week and 50% call Weekend coverage by on call surgeon.<br>BCH: Similar with 2 ACS surgeons | No additional staff | 1-2 Half days per week<br><br>Preferential access to any ORs finished early | No |
|-----------------------------|----------------------------------------------------------------------------------------------------------------------------------------|---------------------|-----------------------------------------------------------------------------|----|

EGH = Etobicoke General Hospital; BCH = Brampton Civic Hospital

*Online appendices are unedited and posted as supplied by the authors.*

**Supplementary Table S2:** Description of the Clavien-Dindo classification of complications<sup>11</sup>

| <b>Clavien-Dindo</b> | <b>Description</b>                                                                                                                                                                                        |
|----------------------|-----------------------------------------------------------------------------------------------------------------------------------------------------------------------------------------------------------|
| <b>Grade 1</b>       | Any deviation from the normal postoperative course without the need for pharmacological treatment or surgical, endoscopic and radiological interventions. This includes infections opened at the bedside. |
| <b>Grade 2</b>       | Requiring pharmacological treatment with drugs other than such allowed for grade I complications. Blood transfusions and total parenteral nutrition are also included.                                    |
| <b>Grade 3</b>       | Requiring surgical, endoscopic or radiological intervention                                                                                                                                               |
| <b>Grade 4</b>       | Life-threatening complication (including CNS complications)‡ requiring IC/ICU-management                                                                                                                  |
| <b>Grade 5</b>       | Death                                                                                                                                                                                                     |
